# Supplementary material for: GlyNet: a multi-task neural network for predicting protein–glycan interactions
Source: PubMed Central journal article supplement (PMC9172296; doi:10.1039/d1sc05681f), 2022-05-16
Supplement: SC-013-D1SC05681F-s002.pdf [file SC-013-D1SC05681F-s002.pdf]

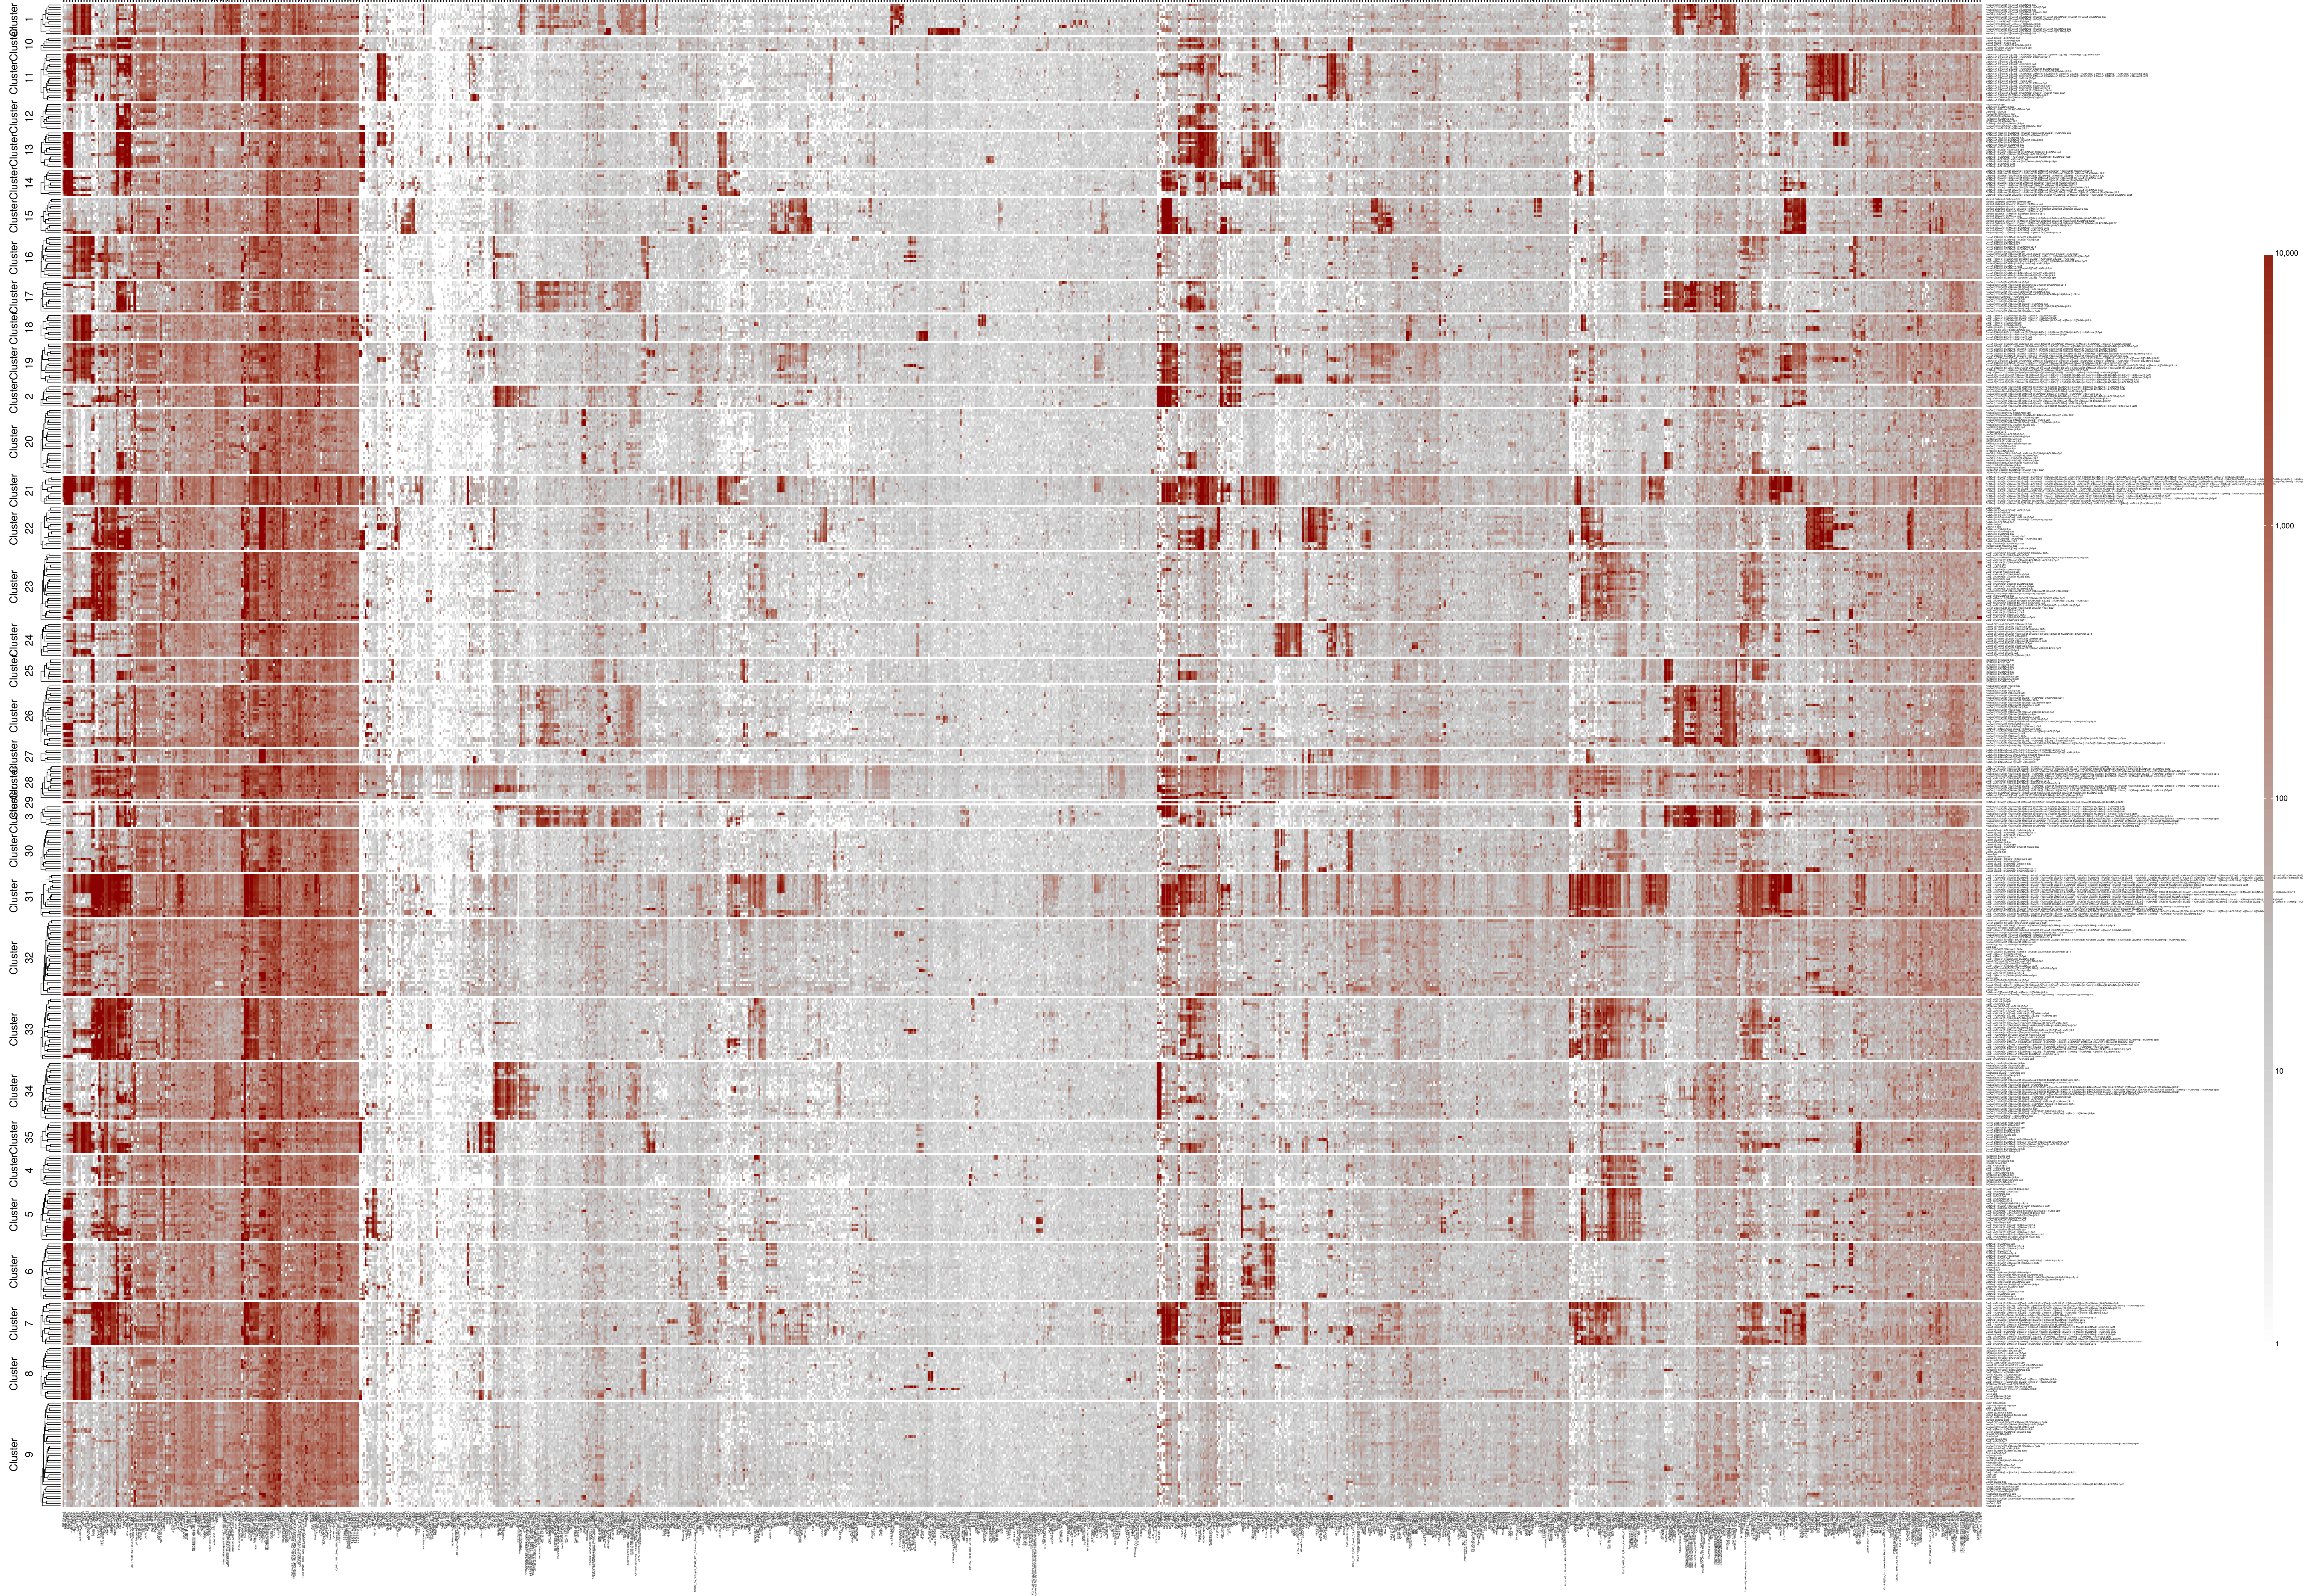

Protein Samples
